# Supplementary material for: Identification and validation a TGF-β-associated long non-coding RNA of head and neck squamous cell carcinoma by bioinformatics method
Source: J Transl Med. 2018 Feb 28;16:46. doi: 10.1186/s12967-018-1418-6 (PMC5831574; doi:10.1186/s12967-018-1418-6)
Supplement: Supplementary file 2 — Additional file 2. Identification of lncRNA signatures related to invasion and metastasis in HNSCC. [file 12967_2018_1418_MOESM2_ESM.xls]

## Sheet: 差异lncRNA
GeneID	lncRNA_Symbol	Fold-change	style	p-value	FDR	Geom mean of intensities in class R	Geom mean of intensities in class NR
1564	CYP2D7	1.63	up	0.0056109	0.186	15.8	9.67
2310	FOXO3B	0.72	down	0.0017078	0.145	531.75	736.46
2679	GGT3P	1.49	up	0.0357051	0.423	16.23	10.86
2713	GK3P	0.48	down	3.52e-05	0.0122	13.56	28.42
2974	GUCY1B2	1.62	up	0.0456709	0.473	5.47	3.38
3116	HLA-DPB2	0.55	down	0.0026709	0.185	2.75	4.97
3580	CXCR2P1	0.49	down	0.0281965	0.516	9.61	19.61
4213	MEIS3P1	0.7	down	0.0196588	0.454	80.21	114.21
6043	SNORA63	1.1	up	0.0136865	0.274	1.14	1.04
7151	TOP1P1	0.72	down	0.0011137	0.113	123.16	171.28
7152	TOP1P2	1.35	up	0.0386606	0.438	5.13	3.8
8420	SNHG3	1.42	up	0.0146618	0.283	72.98	51.46
8512	MBL1P	1.51	up	0.006105	0.193	2.45	1.62
11209	MST1P2	1.64	up	0.0282868	0.38	35.21	21.47
11257	TP53TG1	1.34	up	0.0052751	0.181	369.04	276.37
22973	LAMB2P1	1.52	up	0.0135534	0.273	9.66	6.38
26082	DKFZP434L187	1.32	up	0.0235921	0.35	1.53	1.16
26781	SNORA67	1.17	up	0.0210702	0.333	1.26	1.07
27099	SND1-IT1	0.77	down	0.0247043	0.493	1.33	1.72
51275	MAPKAPK5-AS1	1.2	up	0.0135149	0.273	265.82	222.28
54064	LINC00160	1.27	up	0.0109412	0.249	1.41	1.11
54072	LINC00158	0.81	down	0.0334582	0.548	1.12	1.39
54441	STAG3L1	0.73	down	0.01556	0.416	30.44	41.96
54508	EPB41L4A-AS2	0.71	down	0.0403425	0.583	7	9.84
55000	TUG1	0.8	down	0.0095182	0.341	2967.75	3723.28
55073	LRRC37A4P	0.5	down	0.0002283	0.0416	62.56	124.21
55384	MEG3	1.87	up	0.0071704	0.207	46.57	24.86
55855	FAM45BP	0.61	down	0.0011187	0.113	146.83	242.12
60674	GAS5	1.37	up	0.006699	0.201	1312.78	960.77
63914	LINC01590	1.4	up	0.0155168	0.29	4.42	3.15
64396	GMCL1P1	0.64	down	0.0013813	0.128	5.94	9.34
64493	LINC00235	0.79	down	0.0023625	0.173	1.09	1.38
80086	TUBA4B	2.01	up	0.0021567	0.125	3.4	1.69
80161	ASMTL-AS1	1.55	up	0.0170727	0.303	31.85	20.5
80307	FER1L4	1.58	up	0.0261697	0.367	37.43	23.68
84832	ANKRD36BP1	0.38	down	0.0002529	0.0444	44.15	116.36
84848	MIR503HG	1.62	up	0.0284309	0.381	10.32	6.37
85026	ARRDC1-AS1	1.22	up	0.0152229	0.288	161.67	132.41
85028	SNHG12	1.42	up	0.0243014	0.355	233.09	164.67
90011	KIR3DX1	0.87	down	0.0316214	0.537	1.05	1.2
91450	LOC91450	1.42	up	0.0121292	0.26	6.49	4.56
92070	CTBP1-AS2	0.75	down	0.0033492	0.209	229.1	307.19
93655	ST7-OT3	1.29	up	0.003013	0.143	1.6	1.24
96610	BMS1P20	0.54	down	0.0182219	0.441	5756.25	10591.2
114044	MCM3AP-AS1	0.78	down	0.0326776	0.543	14.87	19.15
119369	NUDT9P1	0.84	down	0.0483232	0.618	1.19	1.42
124221	PRSS30P	1.34	up	0.0314046	0.399	1.91	1.43
128854	TSPY26P	0.5	down	0.0004672	0.0659	3.92	7.81
138649	ANKRD19P	1.42	up	0.0057725	0.188	118.43	83.44
145165	ST13P4	0.86	down	0.0305391	0.531	345.71	401.08
145820	LINC00924	0.63	down	0.0090187	0.333	3.37	5.3
146336	SSTR5-AS1	0.57	down	0.0289458	0.521	2.22	3.91
146880	LOC146880	1.15	up	0.035955	0.424	352.74	306.66
148898	ZNF436-AS1	1.26	up	0.032511	0.405	24.37	19.39
150135	LINC00479	1.44	up	0.0205701	0.329	2.41	1.67
150197	LINC00896	1.52	up	0.0091677	0.23	2.73	1.8
151534	LBX2-AS1	0.8	down	0.01868	0.446	84.15	105.44
152024	LINC00691	0.89	down	0.0459897	0.608	1.09	1.22
153743	PPP1R2P3	0.7	down	0.0053424	0.263	69.82	100.01
153910	LOC153910	1.24	up	0.0088166	0.226	1.3	1.05
155400	NSUN5P1	1.59	up	0.0011664	0.0977	80.32	50.46
157381	LINC00964	1.96	up	0.0013828	0.105	9.87	5.04
157556	BAALC-AS2	1.22	up	0.003191	0.147	1.29	1.06
158381	ATP8B5P	1.33	up	0.0150267	0.286	32.55	24.47
168448	CDC14C	0.64	down	0.0073047	0.304	6.57	10.22
171022	ABHD11-AS1	1.49	up	0.0337212	0.412	4.06	2.73
197187	SNAI3-AS1	1.24	up	0.0482073	0.485	17.62	14.18
220429	CTAGE10P	0.76	down	0.040375	0.583	4.56	6
221442	ADCY10P1	1.62	up	0.0085161	0.223	18.58	11.49
246181	AKR7L	1.38	up	0.0244769	0.356	6.45	4.68
256880	LOC256880	1.3	up	0.0200024	0.325	2.03	1.57
259283	MDS2	1.21	up	0.0260065	0.366	1.49	1.24
260294	NSUN5P2	1.53	up	0.0031865	0.147	200.64	130.85
283050	ZMIZ1-AS1	1.39	up	0.0284134	0.381	12.4	8.92
283131	NEAT1	1.42	up	0.0287474	0.383	6369.49	4484.85
283345	RPL13P5	0.71	down	0.0136103	0.395	9.14	12.8
283422	LINC01559	0.45	down	0.0176302	0.436	14.11	31.68
283521	LINC00282	1.21	up	0.0464258	0.477	1.56	1.29
283596	SNHG10	1.33	up	0.0246288	0.357	63.63	47.73
283922	LOC283922	0.77	down	0.027715	0.513	27.1	35.23
283970	PDXDC2P	1.5	up	0.0004738	0.0688	122.99	82.13
284023	LOC284023	0.81	down	0.0433402	0.597	134.89	165.54
284185	LINC00482	1.64	up	0.0384056	0.437	9.21	5.61
284367	SIGLEC17P	0.62	down	0.016954	0.43	4.31	6.96
284440	LINC00663	1.36	up	0.0239829	0.353	19.84	14.59
285359	PDCL3P4	0.85	down	0.0176761	0.436	74.64	87.42
285905	INTS4P1	0.66	down	0.0130655	0.388	14.26	21.48
286016	TPI1P2	0.79	down	0.0429755	0.595	29.78	37.61
286076	BREA2	1.69	up	0.001218	0.0994	4.72	2.79
286101	ZNF252P	0.83	down	0.0238913	0.487	433.55	522.44
286967	FAM223B	1.45	up	0.0187517	0.316	3.54	2.45
326343	MT1DP	1.33	up	0.0166948	0.3	1.89	1.43
337875	HIST2H2BA	0.6	down	0.0074175	0.306	4.63	7.75
338069	ST7-OT4	1.11	up	0.0232914	0.348	1.17	1.05
339535	LINC01139	0.44	down	0.0321519	0.54	8.44	18.98
339942	H1FX-AS1	1.32	up	0.0366837	0.428	17.46	13.27
374387	DKFZp779M0652	1.42	up	0.0470747	0.48	3.01	2.12
374666	WASH3P	1.19	up	0.0176899	0.308	344.26	288.75
375260	WASH2P	1.2	up	0.0189235	0.317	269.69	223.98
378805	LINC-PINT	1.28	up	0.0326158	0.406	39.96	31.24
379013	RNF138P1	0.59	down	0.0003967	0.0594	17.27	29.08
386593	CHKB-CPT1B	1.37	up	0.0306086	0.394	229.09	166.78
387751	GVINP1	0.46	down	0.0023781	0.174	25.2	54.62
387978	LINC01551	1.13	up	0.0455616	0.473	1.2	1.06
388524	RPSAP58	1.23	up	0.0235708	0.35	9240.56	7529.92
391257	SUMO1P1	1.27	up	0.0315543	0.4	1.37	1.08
400242	DICER1-AS1	1.77	up	0.0002376	0.053	26.11	14.74
400759	GBP1P1	0.65	down	0.0316827	0.538	30.78	47.45
400927	LOC400927	0.76	down	0.021749	0.471	8.92	11.8
401232	LINC01011	1.25	up	0.0412117	0.451	17.97	14.36
407975	MIR17HG	1.53	up	0.0126127	0.265	25.49	16.68
439931	THAP7-AS1	1.45	up	0.0005958	0.0752	65.91	45.48
440101	FLJ12825	1.45	up	0.046913	0.479	4.24	2.93
440307	TTLL13P	1.42	up	0.0387724	0.439	9.01	6.36
440359	YBX3P1	0.74	down	0.0075682	0.309	319.38	433.92
440465	BAIAP2-AS1	0.82	down	0.0437151	0.598	212.26	258.3
440944	THUMPD3-AS1	1.25	up	0.0181441	0.311	111.07	88.88
441208	ZNRF2P1	0.7	down	0.0074173	0.306	35.1	50.09
441502	RPS26P11	1.38	up	0.0013724	0.104	1.65	1.2
441818	WBP11P1	0.59	down	0.000388	0.0586	20.33	34.57
442720	EIF3IP1	1.4	up	0.0094867	0.234	2.29	1.63
595101	SMG1P5	0.71	down	0.0348803	0.555	51.28	71.84
641298	SMG1P1	0.44	down	0.0001332	0.0292	19.58	44.18
641367	LOC641367	0.64	down	0.0087201	0.328	6.75	10.53
642826	BMS1P6	1.22	up	0.0294258	0.387	48.95	40.06
643763	UG0898H09	0.78	down	0.0449254	0.604	1.17	1.52
644128	RPL23AP53	0.76	down	0.0061121	0.28	90.76	118.84
644619	INTS4P2	0.58	down	0.0006831	0.0837	6.5	11.13
646214	LOC646214	0.72	down	0.0022333	0.168	170.22	236.03
647033	PA2G4P4	0.8	down	0.0006383	0.0803	539.75	676.65
647288	CTAGE11P	0.77	down	0.0462901	0.61	15.62	20.3
650623	BEND3P3	0.46	down	0.0003302	0.0528	18.11	39.51
652276	LOC652276	0.7	down	0.0003044	0.0501	29.56	42.04
652966	SNORD10	1.19	up	0.0360339	0.425	1.29	1.09
653635	WASH7P	1.18	up	0.0394278	0.442	1043.04	881.58
653653	LOC653653	0.58	down	0.0050708	0.256	29.13	49.93
654816	NCF1B	0.68	down	0.0372129	0.567	14.97	22.07
677767	SCARNA7	1.23	up	0.0173667	0.305	1.4	1.13
724102	SNHG4	0.66	down	0.0179052	0.439	6.02	9.06
727896	LOC727896	0.61	down	0.0006477	0.081	49.16	81.06
728323	LOC728323	0.73	down	0.0140088	0.399	10.68	14.65
728402	TPI1P3	1.22	up	0.0241222	0.354	1.45	1.19
728448	PPIEL	1.74	up	0.0020379	0.122	24.3	14
728609	SDHAP3	1.21	up	0.0263757	0.368	70.17	58.12
728640	FAM133CP	0.82	down	0.01401	0.399	32.25	39.52
728758	PIN4P1	1.29	up	0.0106565	0.246	76.93	59.69
729082	OIP5-AS1	0.78	down	0.0115362	0.369	557.85	711
729234	FAHD2CP	1.46	up	0.021975	0.339	24.71	16.9
729338	CETN4P	1.24	up	0.0320625	0.403	1.64	1.33
729614	FLJ37453	1.27	up	0.0169827	0.302	93.95	73.89
729799	SEC14L1P1	0.68	down	0.0043902	0.239	8.89	13.05
730101	LOC730101	0.46	down	0.0031432	0.202	30.08	66.1
730971	FLJ36777	1.32	up	0.0246742	0.357	2.26	1.71
100124700	HOTAIR	1.76	up	0.0162052	0.296	7.67	4.35
100129034	LOC100129034	0.8	down	0.034618	0.554	514.52	642.98
100130331	LOC100130331	0.68	down	0.0102162	0.351	26.76	39.21
100131193	CCDC183-AS1	0.75	down	0.0451745	0.605	15.26	20.43
100131434	LINC00893	1.42	up	0.0348562	0.418	13.94	9.85
100132103	FAM66E	0.9	down	0.0265752	0.506	1.01	1.12
100132354	LINC01512	1.27	up	0.0124568	0.263	1.45	1.14
100132948	FAM27C	1.48	up	0.0243026	0.355	12.93	8.73
100133036	FAM95B1	1.66	up	0.0171447	0.303	10.93	6.57
100144603	CHKB-AS1	1.51	up	0.0145127	0.282	15.62	10.36
100233209	PCED1B-AS1	0.71	down	0.0461584	0.609	10.24	14.39
100271836	SMG1P3	0.69	down	0.0048088	0.25	218.65	316.88
100272228	LINC00894	1.45	up	0.0240611	0.353	13.8	9.54
100302640	LINC00882	1.36	up	0.0022127	0.126	1.91	1.41
